# Supplementary material
Source: PubMed Central journal article supplement (PMC6241752)
Supplement: 10-4338-aci-2016-11-ra-0187-supp.pdf [file 10-4338-aci-2016-11-ra-0187-supp.pdf]

<https://doi.org/10.4338/ACI-2016-11-RA-0187>

## **Appendix A:**

### **Pediatric Insulin Calculator User Feedback**

The MiChart pediatric insulin calculator tool was developed to assist the patient care team in determining more accurate insulin doses to provide hyperglycemia correction, carbohydrate coverage, and ketone correction. You received this survey because you have used the insulin calculator within MiChart in some capacity. Please consider taking this short survey to provide feedback regarding your experience and perception of the insulin calculator tool. Participation in this survey is voluntary and all data collected will be kept confidential. Your input will help us identify areas for future improvement.

Please click the "Next" button to continue.

1- What is your position?

- Resident physician
- Fellow physician
- Faculty physician
- PA
- NP
- Nurse
- Pharmacist

2- How did you use the MiChart pediatric insulin calculator?

- Entered new orders
- Modified existing orders
- Calculated and documented the insulin dose on the MAR
- I never used the insulin calculator

3- Please indicate your level of agreement on a scale from 1 to 5 with each of the following statements about the MiChart pediatric insulin calculator based on the most recent version that was released in April, 2015

|                                                         | Strongly Disagree |   |   | Strongly Agree |   |  |
|---------------------------------------------------------|-------------------|---|---|----------------|---|--|
|                                                         | 1                 | 2 | 3 | 4              | 5 |  |
| The pediatric insulin calculator is easy to use         |                   |   |   |                |   |  |
| I feel I had adequate training on the pediatric insulin |                   |   |   |                |   |  |

|                                                                                                   |  |  |  |  |  |
|---------------------------------------------------------------------------------------------------|--|--|--|--|--|
| calculator                                                                                        |  |  |  |  |  |
| The pediatric insulin calculator is reliable -- it does its job consistently                      |  |  |  |  |  |
| The pediatric insulin calculator reduces the time needed to administer insulin when a dose is due |  |  |  |  |  |
| The pediatric insulin calculator reduces dose calculation errors when                             |  |  |  |  |  |

|                                                                                 |  |  |  |  |  |
|---------------------------------------------------------------------------------|--|--|--|--|--|
| compared with other methods of ordering insulin                                 |  |  |  |  |  |
| The pediatric insulin calculator improves quality of patient care               |  |  |  |  |  |
| The pediatric insulin calculator reduces the need for paging ordering providers |  |  |  |  |  |
| Overall, I am satisfied with the pediatric insulin                              |  |  |  |  |  |

|            |  |  |  |  |  |
|------------|--|--|--|--|--|
| calculator |  |  |  |  |  |
|------------|--|--|--|--|--|

4- List the insulin calculator most negative aspect(s):

5- List the insulin calculator most positive aspect(s):

6- What is the one thing you would suggest to change about the MiChart pediatric insulin calculator to make it better?
